# Supplementary material for: Chemical modifications of red phosphor LaPO4:Eu3+nanorods to generate white light
Source: Royal Society of Chemistry journal article supplement (doi:10.1039/b917384f), 2009-11-11
Supplement: b917384f.pdf [file b917384f.pdf]

## Supplementary information

### Chemical modifications of red phosphor $\text{LaPO}_4:\text{Eu}^{3+}$ nanorods to generate white light

Liping Li, Yiguo Su, Guangshe Li\*

#### 1. Chemical analysis using XRD, TEM, TG, and IR.

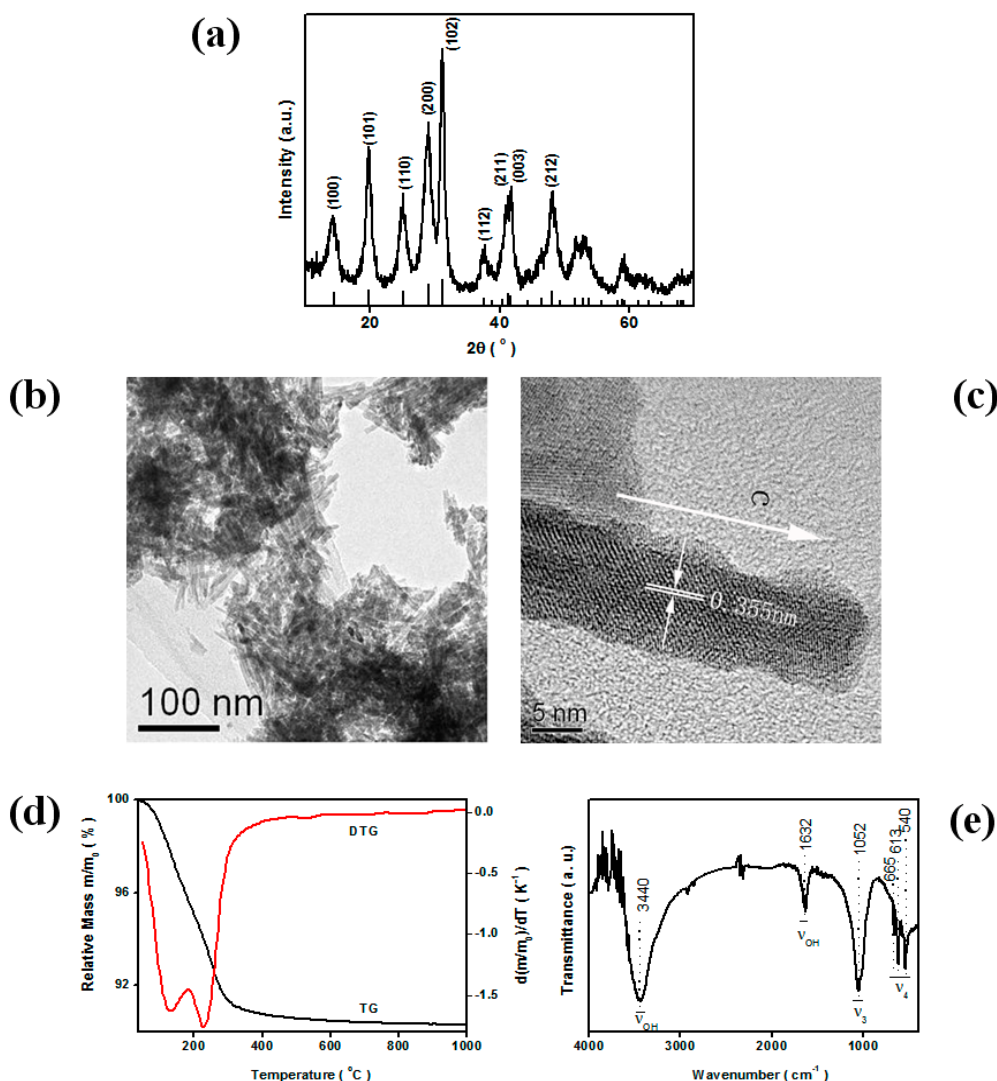

**S1.** Formation of  $\text{LaPO}_4:\text{Eu}^{3+}$  nanorods terminated with highly hydrated layers: (a) XRD, (b) TEM, (c) HRTEM images, (d) TG data, and (e) Infrared spectrum of the  $\text{LaPO}_4:\text{Eu}^{3+}$  nanorods without OA capping. Vertical bars of (a) denote the standard diffraction data of  $\text{LaPO}_4 \cdot x\text{H}_2\text{O}$ . Based on the half height width of peak (100), the crystallite size was calculated using Scherrer formula to be approximately 5.2 nm. From TEM, the sample is seen primarily composed of tiny rods with an axis

ratio less than 10. All nanorods were fully crystallized into tiny crystals with rough surfaces, and the interplanar spacing was about 0.355 nm. Two step weight losses in its TG curve were observed. The first one occurred below 200 °C is associated with the release of 4-5% of residual water absorbed on the sample surface. The second one, beginning at about 200 °C and ending at about 400 °C, corresponds to the dehydration of the hydrated hexagonal  $\text{LaPO}_4 \cdot x\text{H}_2\text{O}$  phase (rhabdophane-type). The total weight loss for the second step which corresponded to a hydration ratio  $x$  of the compound was estimated about 0.5. In the IR spectrum, only the modes of O-P-O, asymmetric bending vibration ( $\nu_4$ ), P-O asymmetric stretching vibration ( $\nu_3$ ), and O-H vibration from surface hydration were observed. These results indicated the highly hydrated terminations of the  $\text{LaPO}_4:\text{Eu}^{3+}$  nanorods.

## 2. Photoluminescence

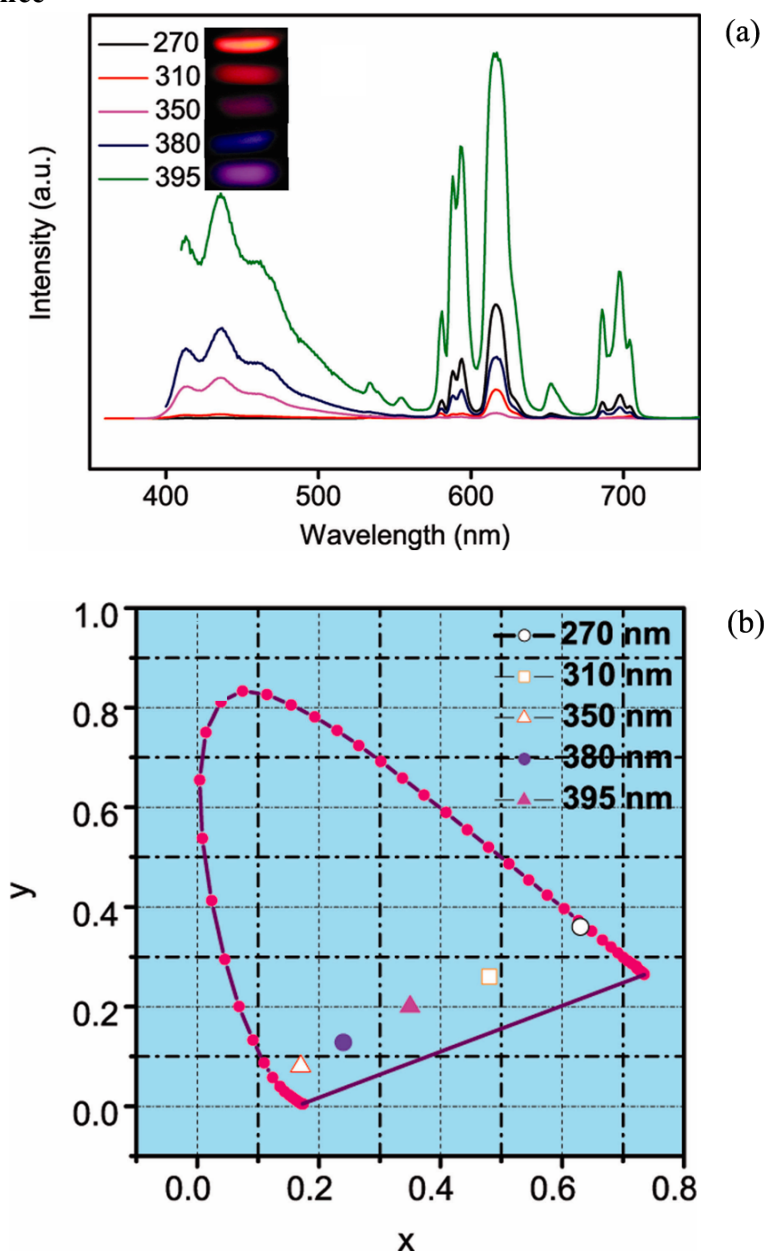

**S2.** (a) Photoluminescence and (b) CIE chromaticity diagram of the bulk monoclinic  $\text{LaPO}_4:\text{Eu}^{3+}$  when excited at different wavelength monitored at 617 nm. Inset shows direct view photographs of tunable color emission from red to blue when excited at given wavelength. Bulk monoclinic  $\text{LaPO}_4:\text{Eu}^{3+}$  was prepared by solid state reactions. Starting chemicals of  $\text{La}_2\text{O}_3$ ,  $\text{Eu}_2\text{O}_3$ , and  $\text{NH}_4\text{H}_2\text{PO}_4$  were first mixed and calcined in air at 900 °C for 3 hours. The obtained product was added into 50 mL aqueous solution containing 1 mL oleic acid and stirred vigorously for 2 hours. Finally, the product was washed with ethanol for several times.

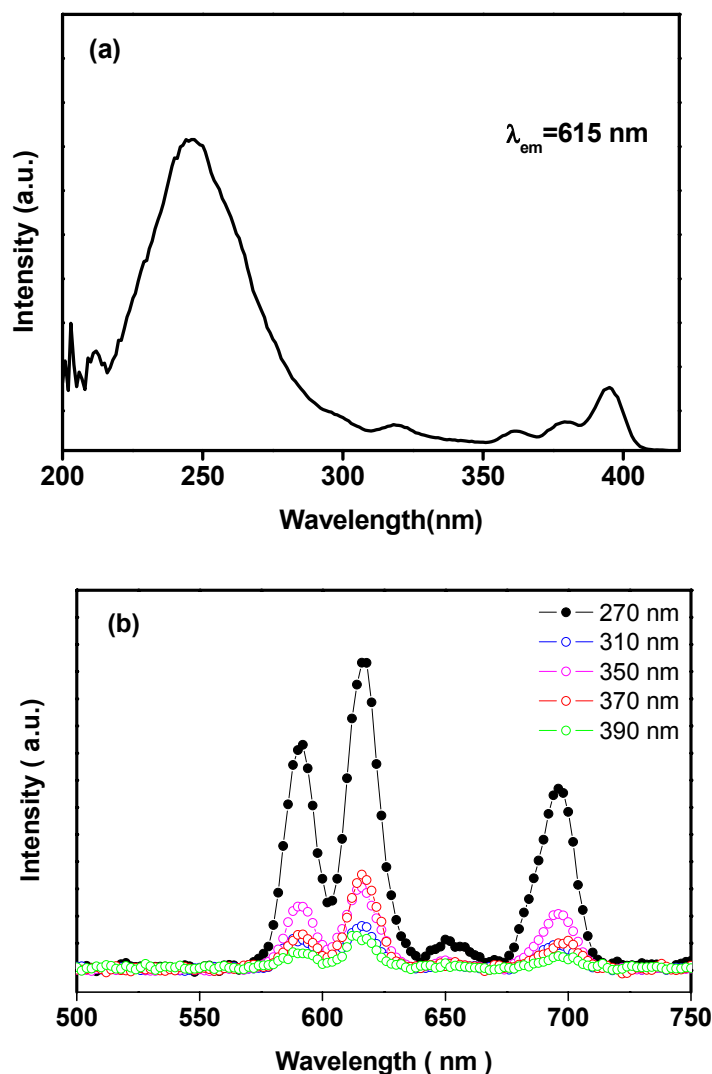

**S3.** (a) Excitation spectrum of the  $\text{LaPO}_4:\text{Eu}^{3+}$  nanorods with no OA capping which was recorded with wavelengths monitored at  $\lambda_{em} = 615 \text{ nm}$ , and (b) emission spectra of the  $\text{LaPO}_4:\text{Eu}^{3+}$  nanorods with no OA capping which were excited at given wavelength. For the excitation spectrum, one broad band centered at 250 nm and several weak lines in the range of 400-450 nm were observed. The broad band is attributed to the Eu–O charge transfer, while the weak lines correspond to the direct excitation of the  $\text{Eu}^{3+}$  ground state to higher levels of the 4f-manifold [H. Meysamy, K.

Riwotzki, A. Kornowski, S. Naused, M. Hasse, Adv. Mater. 11 (1999) 840]. For the emission spectra, when excited at 270 nm, four sharp emission lines located at 592, 615, 651, and 698 nm were observed, which are characteristic of the  $\text{Eu}^{3+}$  transitions from  $^5\text{D}_0$  to  $^7\text{F}_J$  ( $J=1, 2, 3, 4$ ), respectively. The  $\text{Eu}^{3+}$  emissions were weakened obviously when excited at 310, 370, and 390 nm.

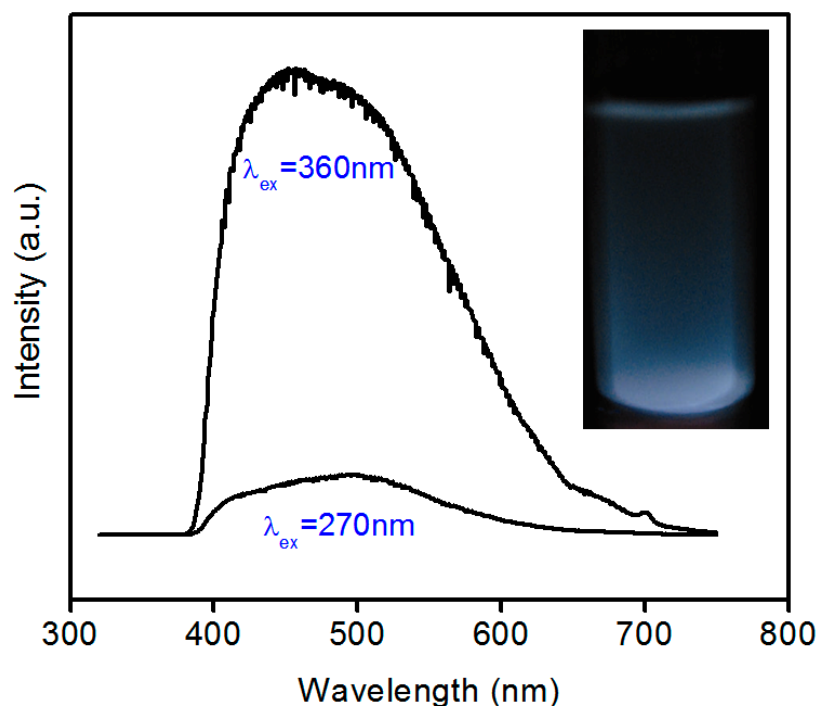

**S4.** Photoluminescence of OA-capped  $\text{LaPO}_4$  nanorods when excited at 270 and 360 nm. Inset presents a direct view photograph of the nanorods dispersed in cyclohexane when excited at 360 nm.

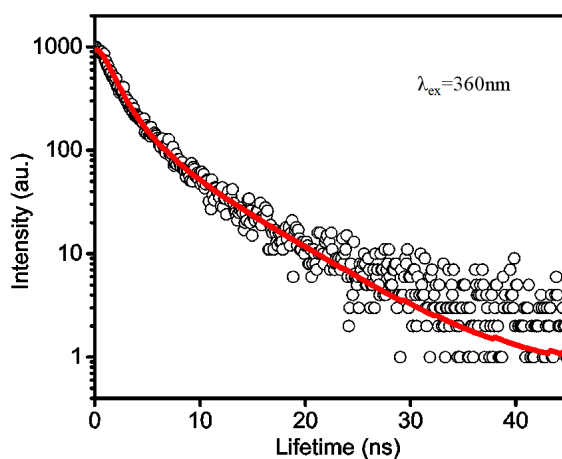

**S5.** Luminescent decay of the OA-capped LaPO<sub>4</sub>:Eu<sup>3+</sup> nanorods detected at 480 nm. The raw data were fitted into a double-exponential function,  $I(t) = A_1 \exp(-t/\tau_1) + A_2 \exp(-t/\tau_2)$ , where  $\tau_1$  and  $\tau_2$  are the fast and slow components of the luminescent lifetime, while  $A_1$  and  $A_2$  are the fitting parameters, respectively. The average lifetime is determined to be 5.38 ns, using the formula[1],

$$\text{of } \tau_{\text{eff}} = \frac{\int_0^{\infty} tI(t)dt}{\int_0^{\infty} I(t)dt} = 16763/3118 \text{ ns.}$$

[1] Shionoya, S.; Yen, W. M. *Phosphor Handbook*; CRC Press: Boca Raton, FL, 1999.

**S6.** Relative intensities of <sup>5</sup>D<sub>0</sub>-<sup>7</sup>F<sub>2</sub> transition of Eu<sup>3+</sup> emission at 615 nm for given samples excited at various wavelength

| $\lambda_{\text{ex}} / \text{nm}$ | Relative Intensity                               |                                     |                                            |
|-----------------------------------|--------------------------------------------------|-------------------------------------|--------------------------------------------|
|                                   | OA-capped<br>LaPO <sub>4</sub> :Eu <sup>3+</sup> | LaPO <sub>4</sub> :Eu <sup>3+</sup> | bulk M-LaPO <sub>4</sub> :Eu <sup>3+</sup> |
| 270                               | 1                                                | 1                                   | 1                                          |
| 310                               | 0.47                                             | 0.30                                | 0.25                                       |
| 330                               | 0.41                                             | ---                                 | 0.09                                       |
| 350                               | 0.42                                             | 0.10                                | 0.05                                       |
| 370                               | ---                                              | 0.14                                | ---                                        |
| 380                               | 0.65                                             | ---                                 | 0.54                                       |
| 390                               | ---                                              | 0.27                                | ---                                        |
| 395                               | 1.82                                             | ---                                 | 3.16                                       |

The relative intensity ratio of <sup>5</sup>D<sub>0</sub>-<sup>7</sup>F<sub>2</sub> transition of Eu<sup>3+</sup> emission at 615 nm under various excitations were obtained by taking the intensity under  $\lambda_{\text{ex}}=270$  nm as unity, in which the raw emission data of three samples were adopted from Figures 7, S3, and S2, respectively. Distinct from other two samples, OA-capped LaPO<sub>4</sub>:Eu<sup>3+</sup> sample showed emissions that are coupled with an apparent background. Therefore, the relative intensity ratio for OA-capped LaPO<sub>4</sub>:Eu<sup>3+</sup> was calculated by subtracting the background contributed from the broad green-blue emission. It can be seen that under  $\lambda_{\text{ex}}=310$  and 350 nm (i.e., not the characteristic excitations of Eu<sup>3+</sup>), the relative intensity of <sup>5</sup>D<sub>0</sub>-<sup>7</sup>F<sub>2</sub> transition of Eu<sup>3+</sup> emission at 615 nm was significantly weakened for three samples. On the other hand, under  $\lambda_{\text{ex}}=350$  nm, the relative intensity for OA-capped LaPO<sub>4</sub>:Eu<sup>3+</sup> is 0.42, which is much higher than that of 0.10 for LaPO<sub>4</sub>:Eu<sup>3+</sup> or 0.05 for bulk M- LaPO<sub>4</sub>:Eu<sup>3+</sup>. These observations indicate that the Eu<sup>3+</sup> emission was likely enhanced by an energy transfer process.
